# Supplementary material
Source: Royal Society of Chemistry journal article supplement (doi:10.1039/d5cp05039a)
Supplement: d5cp05039a1.pdf [file d5cp05039a1.pdf]

## Supporting Information

### A Theoretical Study on the Structural Evolution and Stability of $\text{Pt}_x\text{Cu}_y$ Heteronuclear Clusters Supported on $\text{t-ZrO}_2(101)$ Surface

Wen Li,<sup>a</sup> Jin-Tao Gou,<sup>a</sup> Ting-Hao Liu,<sup>a</sup> Ming-Hui Zhang,<sup>a</sup> Han-Yun Min,<sup>a</sup> Chang-Wei Hu<sup>b</sup> and Hua-Qing Yang<sup>a\*</sup>

<sup>a</sup> College of Chemical Engineering, Sichuan University, Chengdu, Sichuan, 610065, P.R. China.

<sup>b</sup> National and Local Joint Engineering Laboratory for Energy Plant Bio-oil Production and Application; Key Laboratory of Green Chemistry and Technology, Ministry of Education; College of Chemistry, Sichuan University, Chengdu, Sichuan, 610064, P.R. China.

\*Correspondence to:

H.-Q. Yang; e-mail: [huaqingyang@scu.edu.cn](mailto:huaqingyang@scu.edu.cn);

Fax: 86 28 85464466;

Telephone: 86 28 85464466

## Catalogue

- (1). **Figure S1** The relative Gibbs free energy and top view of (a) t-ZrO<sub>2</sub>(101); (b) t-ZrO<sub>2</sub>(101)-Ov(O-3), (c) t-ZrO<sub>2</sub>(101)-Ov(O4)..... 1
- (2). **Figure S2** Selection of the QM region ..... 2
- (3). **Figure S3** The most stable geometries of Pt<sub>x</sub> and Cu<sub>y</sub> (x, y = 1 ~ 5) clusters in the gas phase. 3
- (4). **Figure S4** The geometries and relative Gibbs free energies for Pt<sub>x</sub> (x = 1 ~ 5) clusters on the t-ZrO<sub>2</sub>(101) surface ..... 4
- (5). **Figure S5** The geometries and relative Gibbs free energies for Cu<sub>y</sub> (y = 1 ~ 5) clusters on the t-ZrO<sub>2</sub>(101) surface ..... 5
- (6). **Figure S6** The most stable geometries of Pt<sub>x</sub>Cu<sub>y</sub> (x + y = 2 ~ 5) clusters in the gas phase ..... 6
- (7). **Figure S7** The geometries and relative Gibbs free energies for Pt<sub>1</sub>Cu<sub>1</sub> cluster on the t-ZrO<sub>2</sub>(101) surface..... 7
- (8). **Figure S8** The geometries and relative Gibbs free energies for Pt<sub>x</sub>Cu<sub>y</sub> (x + y = 3) cluster on the t-ZrO<sub>2</sub>(101) surface ..... 8
- (9). **Figure S9** The geometries and relative Gibbs free energies for Pt<sub>x</sub>Cu<sub>y</sub> (x + y = 4) cluster on the t-ZrO<sub>2</sub>(101) surface ..... 10
- (10). **Figure S10** The geometries and relative Gibbs free energies for Pt<sub>x</sub>Cu<sub>y</sub> (x + y = 5) cluster on the t-ZrO<sub>2</sub>(101) surface ..... 12
- (11). **Table S1.** Zero-point vibrational energies (ZPVE, hartree), sum of electronic energies in the gas phase ( $E_{t, g}$ , hartree), thermal correction to Gibbs free energies ( $G_0$ , hartree), sum of electronic and thermal Gibbs free energies ( $G_c$ , hartree) and the relative Gibbs free energies ( $G_r$ , eV) of t-ZrO<sub>2</sub>(101), t-ZrO<sub>2</sub>(101)-Ov(O3), and t-ZrO<sub>2</sub>(101)-Ov(O4). ..... 13
- (12). **Table S2.** Zero-point vibrational energies (ZPVE, hartree), sum of electronic energies in the gas phase ( $E_{t, g}$ , hartree), thermal correction to Gibbs free energies ( $G_0$ , hartree), sum of electronic and thermal Gibbs free energies ( $G_c$ , hartree) and the relative Gibbs free energies ( $G_r$ , eV) of Pt<sub>x</sub> and Cu<sub>y</sub> (x, y = 1 ~ 5). ..... 14
- (13). **Table S3.** Zero-point vibrational energies (ZPVE, hartree), sum of electronic energies in the gas phase ( $E_{t, g}$ , hartree), thermal correction to Gibbs free energies ( $G_0$ , hartree), sum of electronic and thermal Gibbs free energies ( $G_c$ , hartree) and the relative Gibbs free energies ( $G_r$ , eV) of Pt<sub>x</sub>/ZrO<sub>2</sub>(101) (x = 1 ~ 5). ..... 15
- (14). **Table S4.** The binding energies ( $G_{BE}$ , eV), the clusters deformation energies ( $\Delta G_{def, Pt_x}$ , eV), the t-ZrO<sub>2</sub> (101) deformation energies ( $\Delta G_{def, ZrO_2}$ , eV), the metal-metal bond energy ( $\Delta G_{bond, Pt_x}$ , eV), the metal-support interaction energies ( $G_{MS}$ , eV), the nucleation energies ( $G_{nuc}$ , eV), and the charge transfer (ET) for the most stable configurations of Pt<sub>x</sub>/ZrO<sub>2</sub>(101) (x = 1 ~ 5). ..... 16
- (15). **Table S5.** Zero-point vibrational energies (ZPVE, hartree), sum of electronic energies in the gas phase ( $E_{t, g}$ , hartree), thermal correction to Gibbs free energies ( $G_0$ , hartree), sum of electronic and thermal Gibbs free energies ( $G_c$ , hartree) and the relative Gibbs free energies ( $G_r$ , eV) of Cu<sub>y</sub>/ZrO<sub>2</sub>(101) (y = 1 ~ 5). ..... 17

- 
- (16). **Table S6.** The binding energies ( $G_{BE}$ , eV), the clusters deformation energies ( $\Delta G_{def,Cu_y}$ , eV), the t-ZrO<sub>2</sub>(101) deformation energies ( $\Delta G_{def,ZrO_2}$ , eV), the metal-metal bond energy ( $\Delta G_{bond,Cu_y}$ , eV), the metal-support interaction energies ( $G_{MS}$ , eV), the nucleation energies ( $G_{nuc}$ , eV), and the charge transfer (ET) for the most stable configurations of Cu<sub>y</sub>/ZrO<sub>2</sub>(101) ( $y = 1 \sim 5$ )..... 18
- (17). **Table S7.** Zero-point vibrational energies (ZPVE, hartree), sum of electronic energies in the gas phase ( $E_{t, g}$ , hartree), thermal correction to Gibbs free energies ( $G_0$ , hartree), sum of electronic and thermal Gibbs free energies ( $G_c$ , hartree) and the relative Gibbs free energies ( $G_r$ , eV) of Pt<sub>x</sub>Cu<sub>y</sub> ( $x + y = 2 \sim 5$ ) clusters in the gas phase. .... 19
- (18). **Table S8.** Zero-point vibrational energies (ZPVE, hartree), sum of electronic energies in the gas phase ( $E_{t, g}$ , hartree), thermal correction to Gibbs free energies ( $G_0$ , hartree), sum of electronic and thermal Gibbs free energies ( $G_c$ , hartree) and the relative Gibbs free energies ( $G_r$ , eV) of Pt<sub>x</sub>Cu<sub>y</sub>/ZrO<sub>2</sub> ( $x + y = 2 \sim 5$ )..... 20
- (19). **Table S9.** The binding energies ( $G_{BE}$ , eV), the clusters deformation energies ( $\Delta G_{def,Pt_xCu_y}$ , eV), the t-ZrO<sub>2</sub>(101) deformation energies ( $\Delta G_{def,ZrO_2}$ , eV), the metal-metal bond energy ( $\Delta G_{bond,Pt_xCu_y}$ , eV), the metal-support interaction energies ( $G_{MS}$ , eV), the nucleation energies ( $G_{nuc}$ , eV), and the charge transfer (ET) for the most stable configurations of Pt<sub>x</sub>Cu<sub>y</sub>/ZrO<sub>2</sub>(101) ( $x + y = 2 \sim 5$ )..... 23

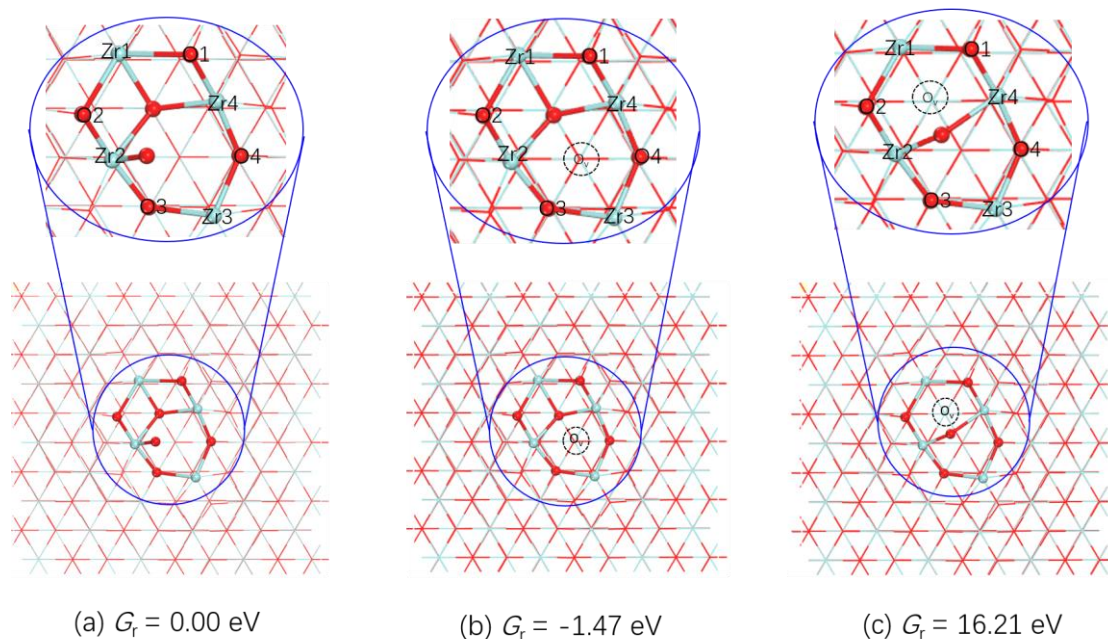

**Figure S1** The relative Gibbs free energy ( $G_r$ ) and top view of (a) t-ZrO<sub>2</sub>(101); (b) t-ZrO<sub>2</sub>(101)-Ov(O-3), (c) t-ZrO<sub>2</sub>(101)-Ov(O4). “Ov” represents an oxygen vacancy.

**Notes:**

The calculation of  $G_r$  according to the following eq:

$$G_r = G(\text{Zr}_{120}\text{O}_{239}\text{-Ov}) - G(\text{Zr}_{120}\text{O}_{240}) + 1/2 G(^3\text{O}_2). \text{ (Reaction: } \text{Zr}_{120}\text{O}_{240} \rightarrow \text{Zr}_{120}\text{O}_{239}\text{-Ov} + 1/2 ^3\text{O}_2\text{).}$$

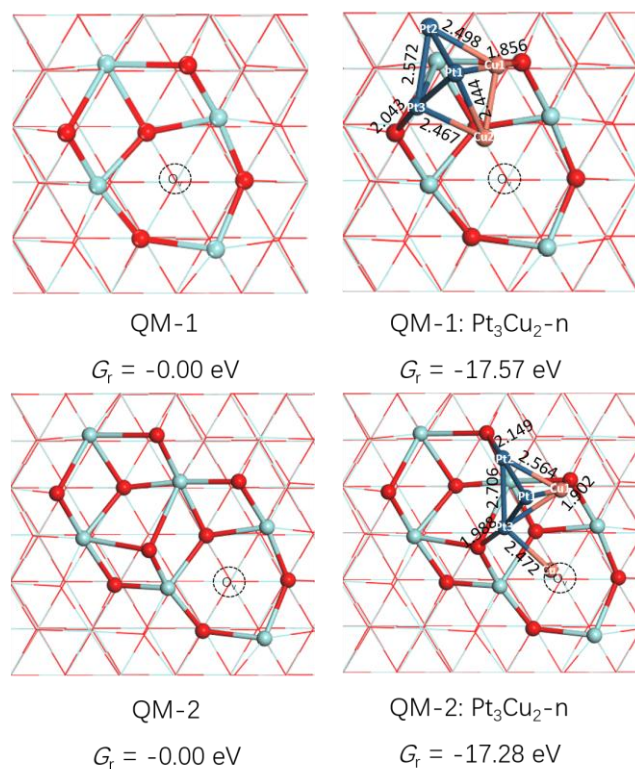

**Figure S2** Selection of the QM region. “Ov” represents an oxygen vacancy.

**Notes:**

The QM region (QM-1): 4 Zr atoms, 5 O atoms and the Pt<sub>x</sub>Cu<sub>y</sub> cluster.

the QM region (QM-2): 6 Zr atoms, 9 O atoms and the Pt<sub>x</sub>Cu<sub>y</sub> cluster.

For instance, using the current approach (QM-1), the relative Gibbs free energy ( $G_r$ ) for Pt<sub>3</sub>Cu<sub>2</sub>-n (Pt<sub>3</sub>Cu<sub>2</sub>/ZrO<sub>2</sub>) was calculated to be  $-17.57$  eV. With the newly extended QM region (QM-2), the corresponding  $G_r$  value was  $-17.28$  eV. The difference between the two methods is only  $-0.29$  eV, corresponding to a marginal relative error of just 1.6%. Consequently, we opted to retain the original QM region (QM-1) for subsequent calculations.

The calculation of  $G_r$  according to the following eq:

$$G_r = G(\text{Pt}_3\text{Cu}_2/\text{Zr}_{120}\text{O}_{239}\text{-Ov}) - G(\text{Zr}_{120}\text{O}_{239}\text{-Ov}) - 3G(^3\text{Pt}) - 2G(^2\text{Cu}).$$

$$(\text{Reaction: } \text{Zr}_{120}\text{O}_{239}\text{-Ov} + 3\ ^3\text{Pt} + 2\ ^2\text{Cu} \rightarrow \text{Pt}_3\text{Cu}_2/\text{Zr}_{120}\text{O}_{239}\text{-Ov}).$$

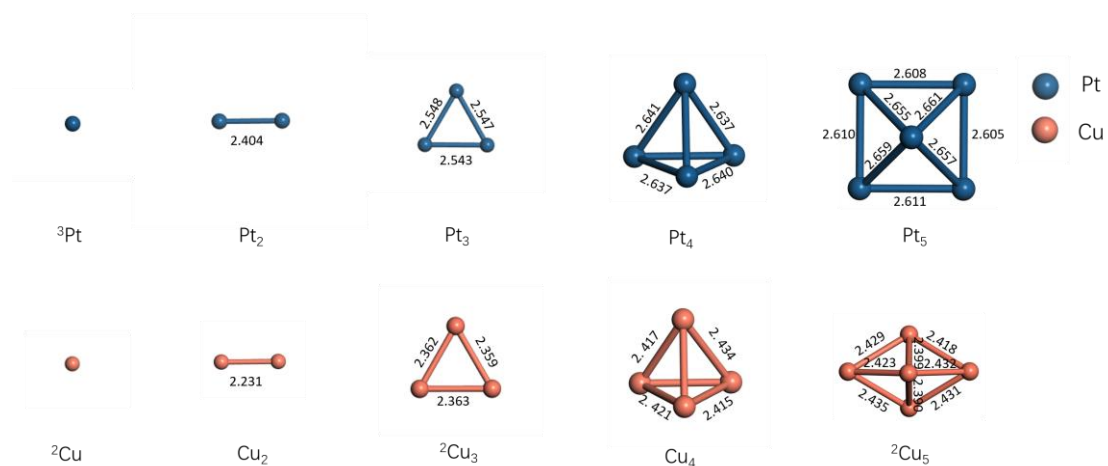

**Figure S3** The most stable geometries of Pt<sub>x</sub> and Cu<sub>y</sub> (x, y = 1 ~ 5) clusters in the gas phase. The dark blue and orange atoms represent Pt and Cu, respectively. The superscript prefixes "2" and "3" are used to indicate the doublet and triplet state, respectively, while the default is denoted the singlet state. The black numbers represent distances (Å).

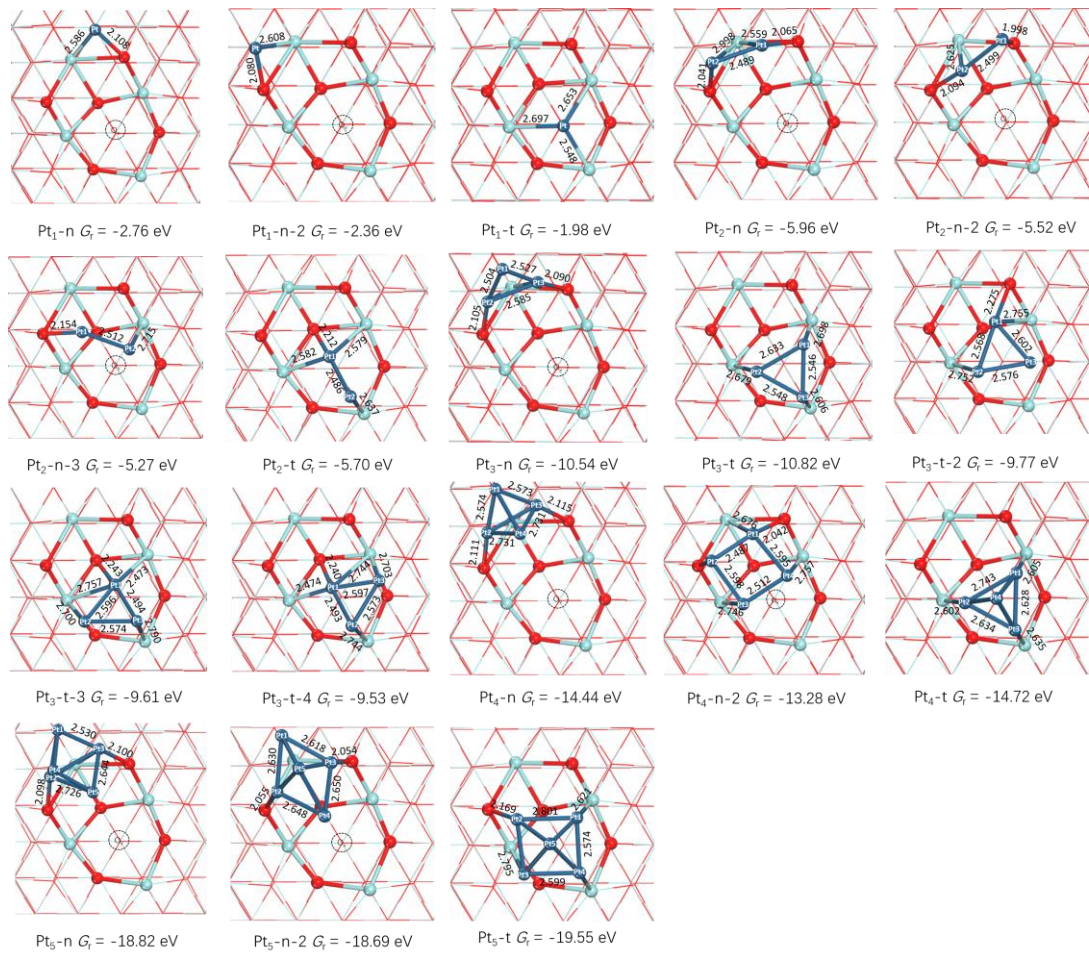

**Figure S4** The geometries and relative Gibbs free energies ( $G_r$ ) for Pt<sub>x</sub> (x = 1 ~ 5) clusters on the t-ZrO<sub>2</sub>(101) surface. The black numbers represent distances (Å).

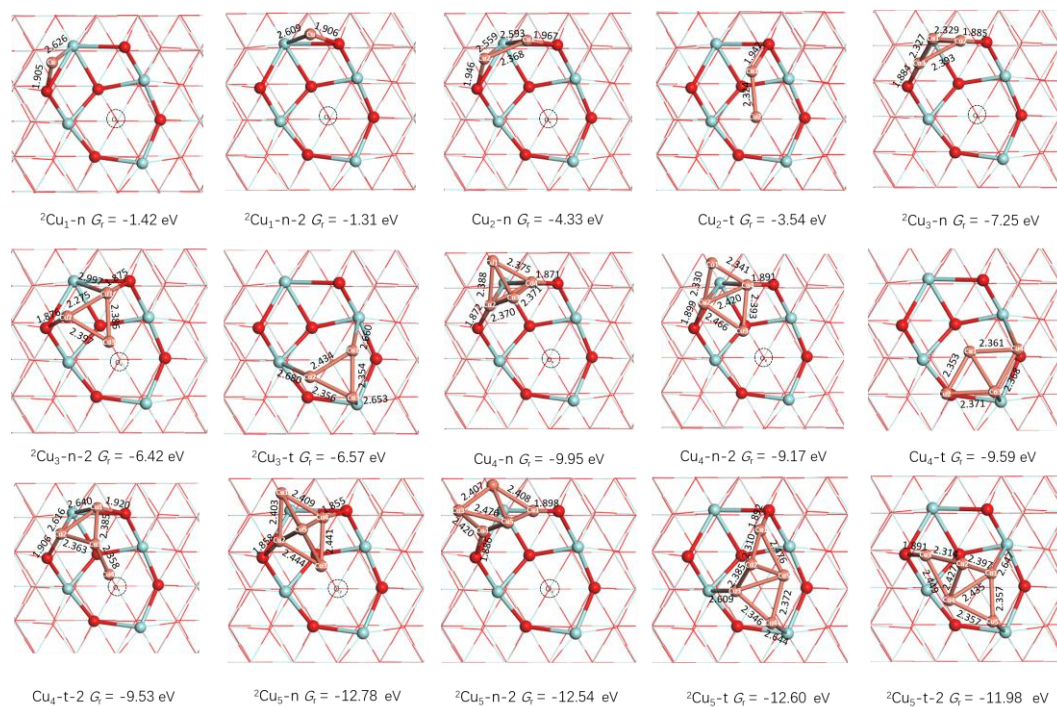

**Figure S5** The geometries and relative Gibbs free energies ( $G_r$ ) for  $\text{Cu}_y$  ( $y = 1 \sim 5$ ) clusters on the  $\text{t-ZrO}_2(101)$  surface. The superscript prefixes “2” is used to indicate the doublet state, while the default is denoted the singlet state. The black numbers represent distances ( $\text{\AA}$ ).

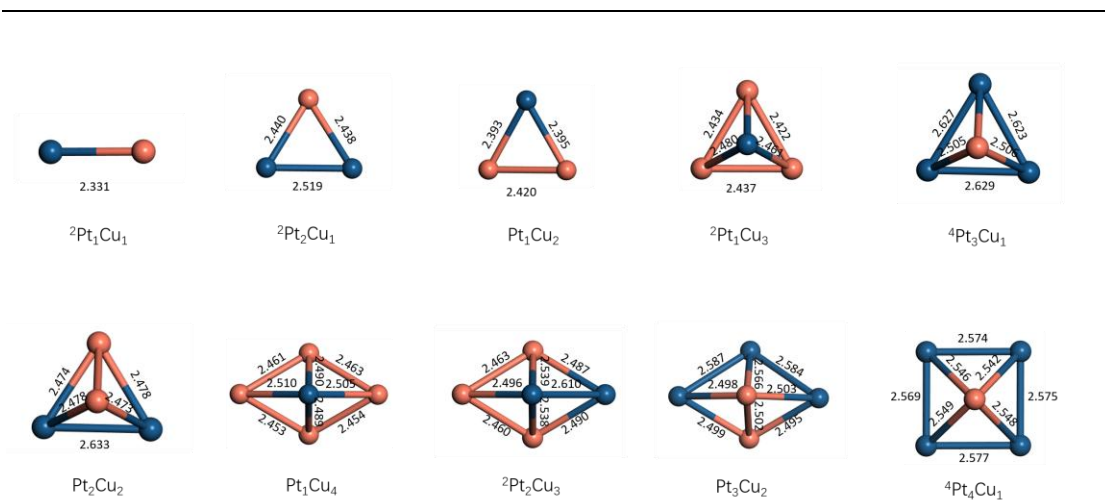

**Figure S6** The most stable geometries of  $Pt_xCu_y$  ( $x + y = 2 \sim 5$ ) clusters in the gas phase. The superscript prefixes "2" and "4" are used to indicate the doublet and quartet state, while the default is denoted the singlet state. The black numbers represent distances ( $\text{\AA}$ ).

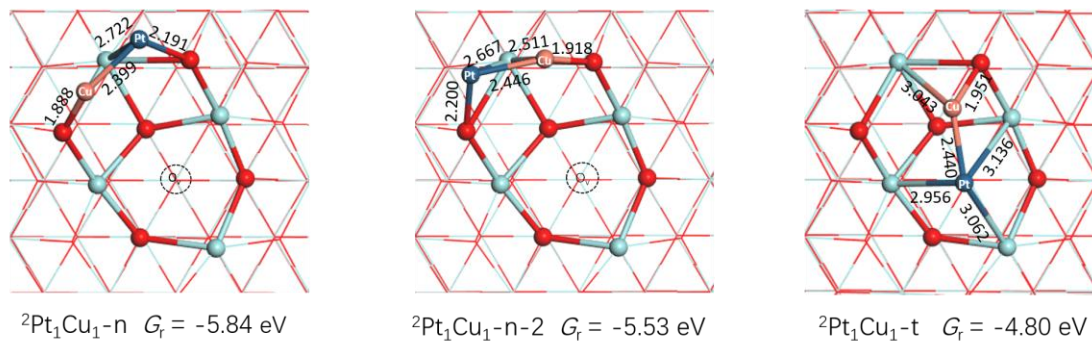

**Figure S7** The geometries and relative Gibbs free energies ( $G_r$ ) for  $\text{Pt}_1\text{Cu}_1$  cluster on the t- $\text{ZrO}_2(101)$  surface. The superscript prefixes “2” is used to indicate the doublet state. The black numbers represent distances (Å).

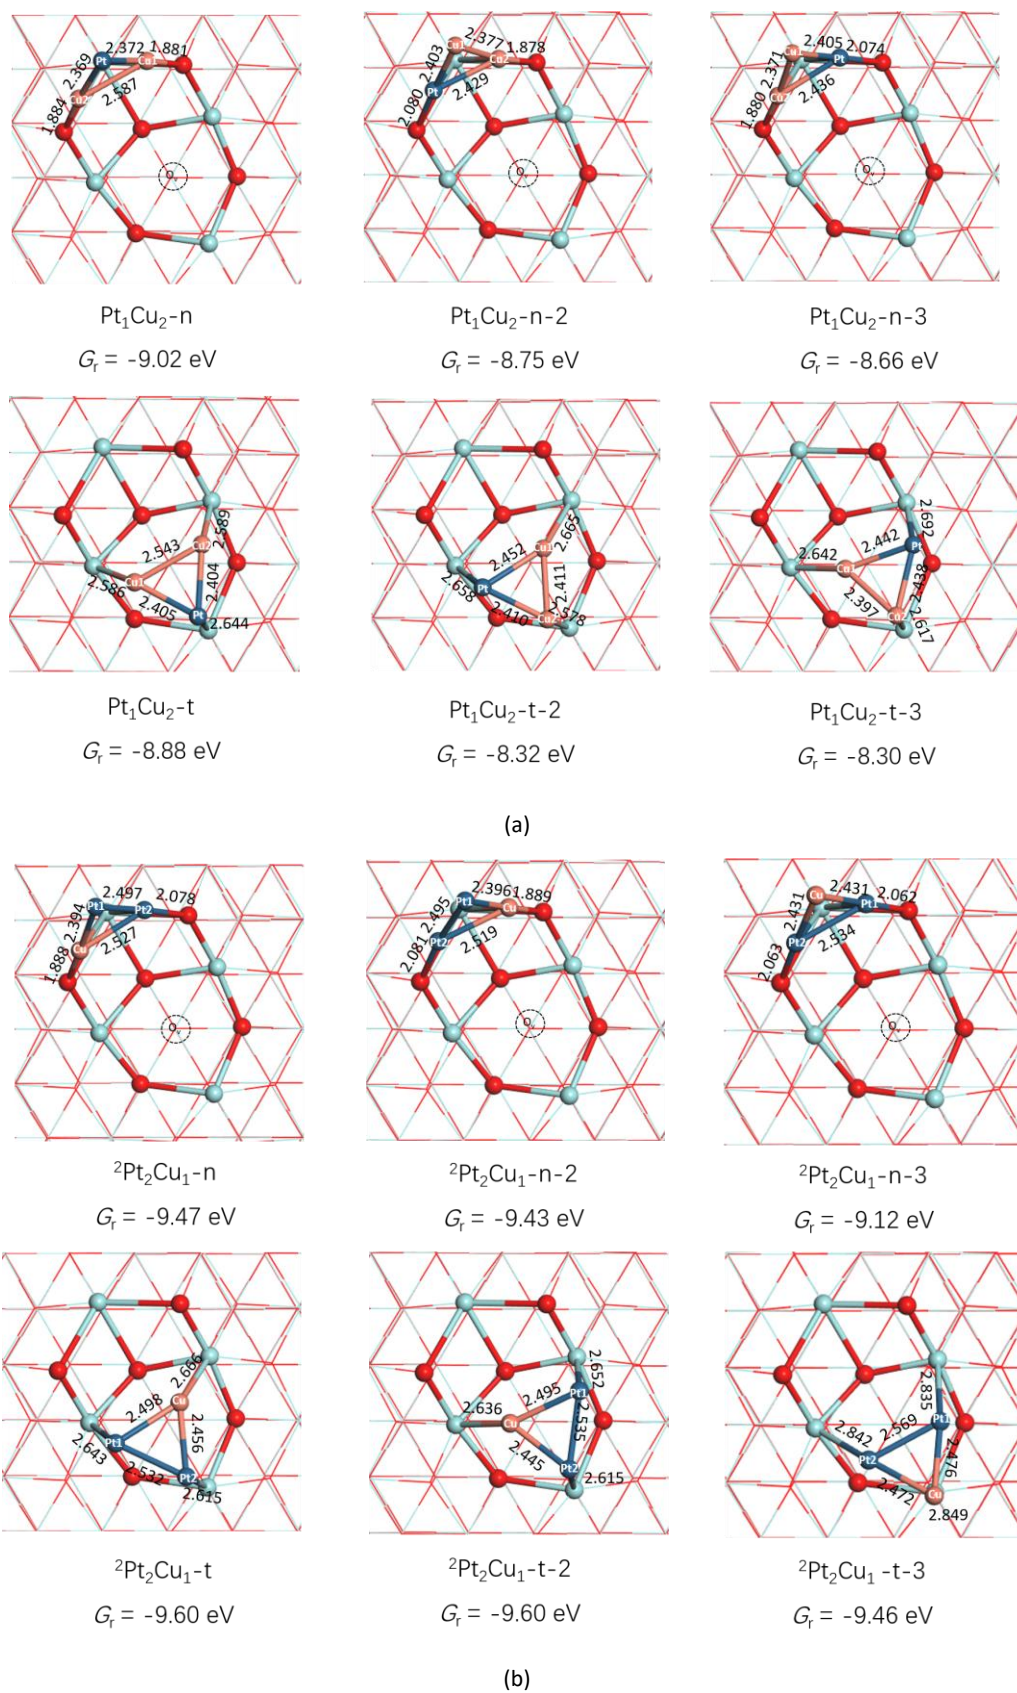

**Figure S8** The geometries and relative Gibbs free energies ( $G_r$ ) for Pt<sub>x</sub>Cu<sub>y</sub> ( $x + y = 3$ ) cluster on the t-ZrO<sub>2</sub>(101) surface. The black numbers represent distances (Å). (a) Pt<sub>1</sub>Cu<sub>2</sub>/ZrO<sub>2</sub>(101), (b)Pt<sub>2</sub>Cu<sub>1</sub>/ZrO<sub>2</sub>(101).

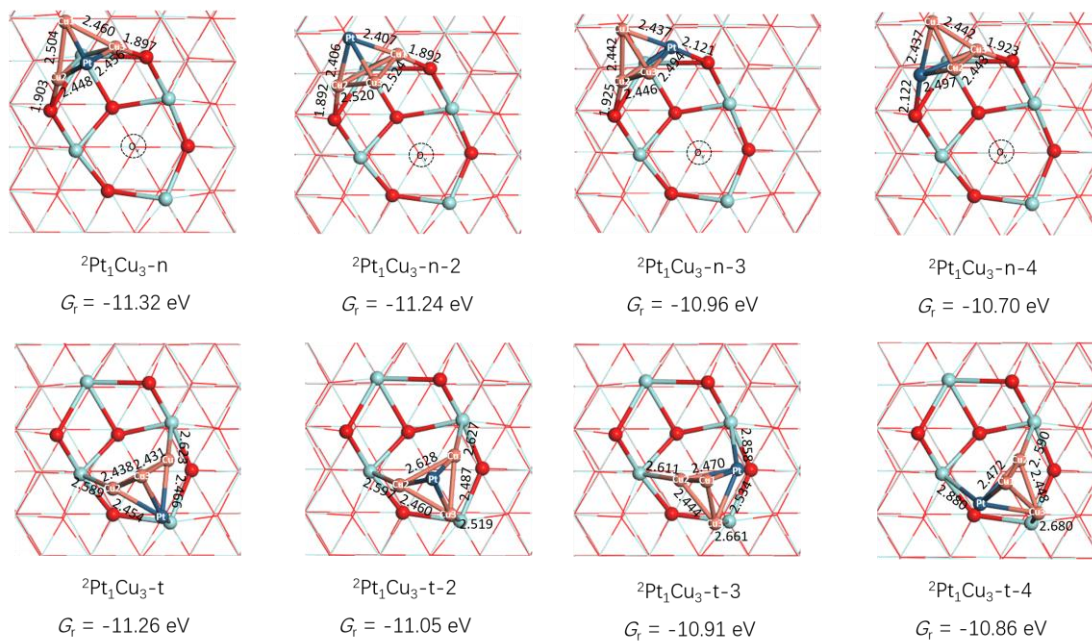

(a)

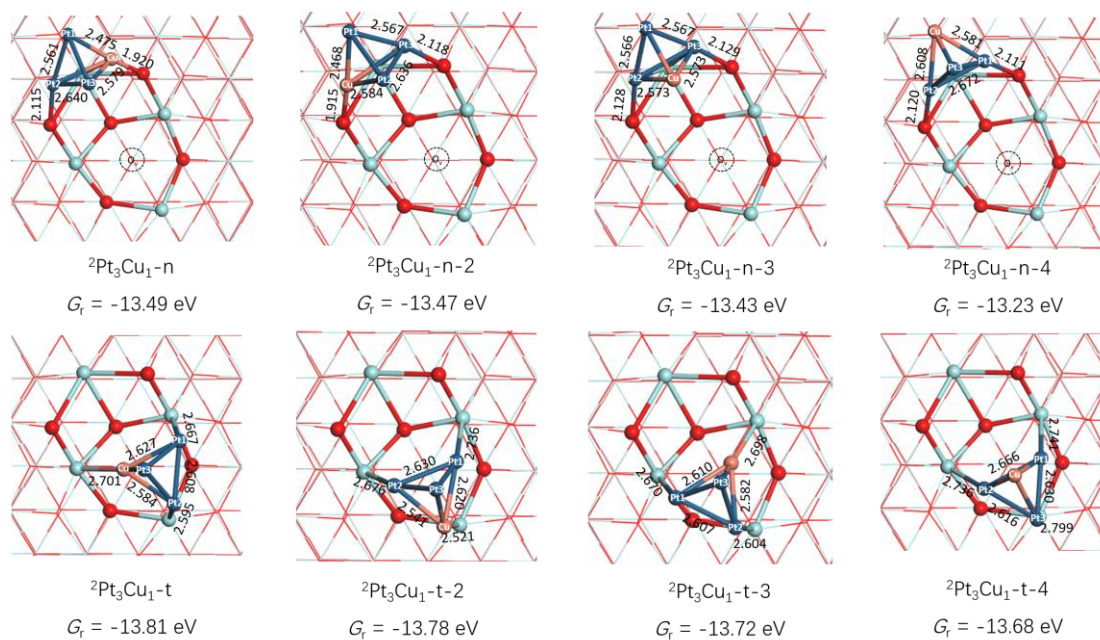

(b)

Continue Figure S9

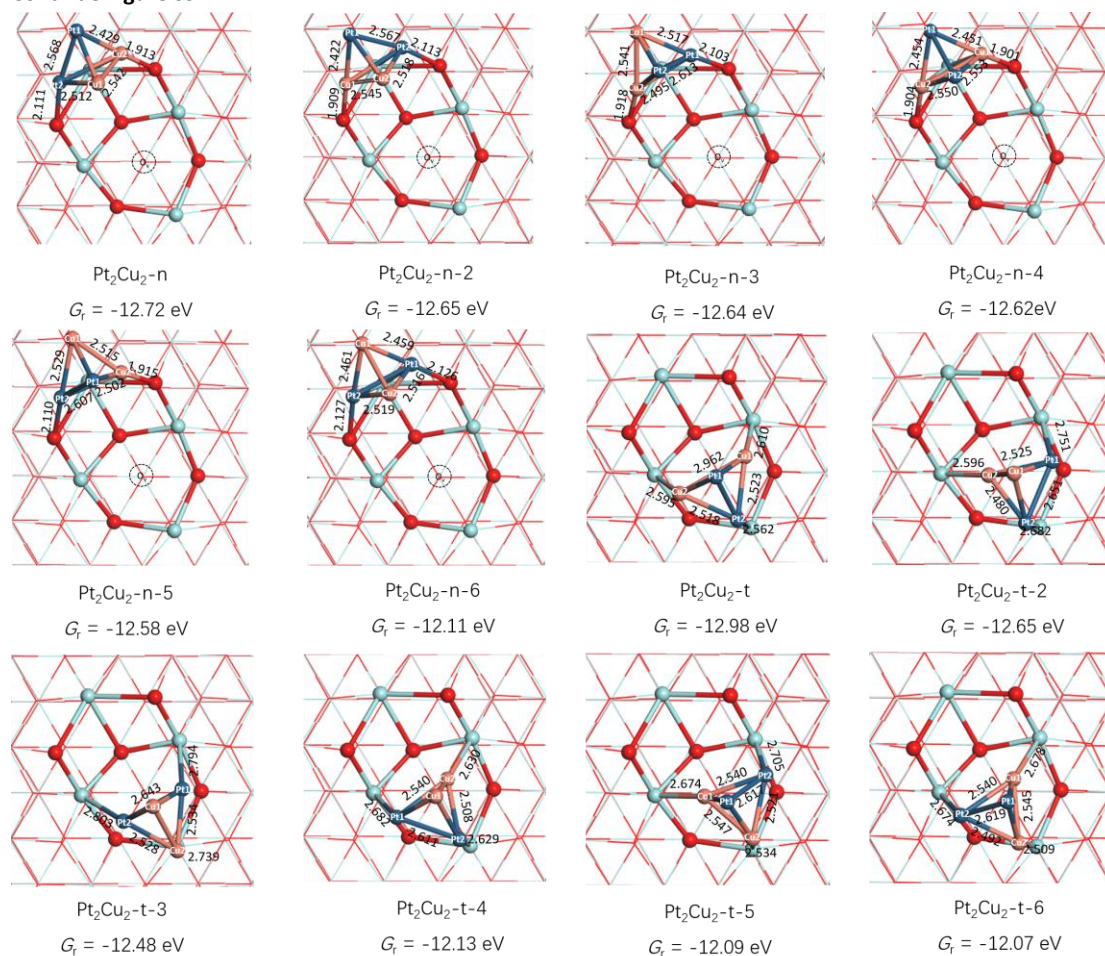

(c)

**Figure S9** The geometries and relative Gibbs free energies ( $G_r$ ) for Pt<sub>x</sub>Cu<sub>y</sub> ( $x + y = 4$ ) cluster on the t-ZrO<sub>2</sub>(101) surface. (a)Pt<sub>1</sub>Cu<sub>3</sub>/ZrO<sub>2</sub>(101), (b)Pt<sub>3</sub>Cu<sub>1</sub>/ZrO<sub>2</sub>(101), (c) Pt<sub>2</sub>Cu<sub>2</sub>/ZrO<sub>2</sub>(101). The superscript prefixes “2” is used to indicate the doublet state. The black numbers represent distances (Å).

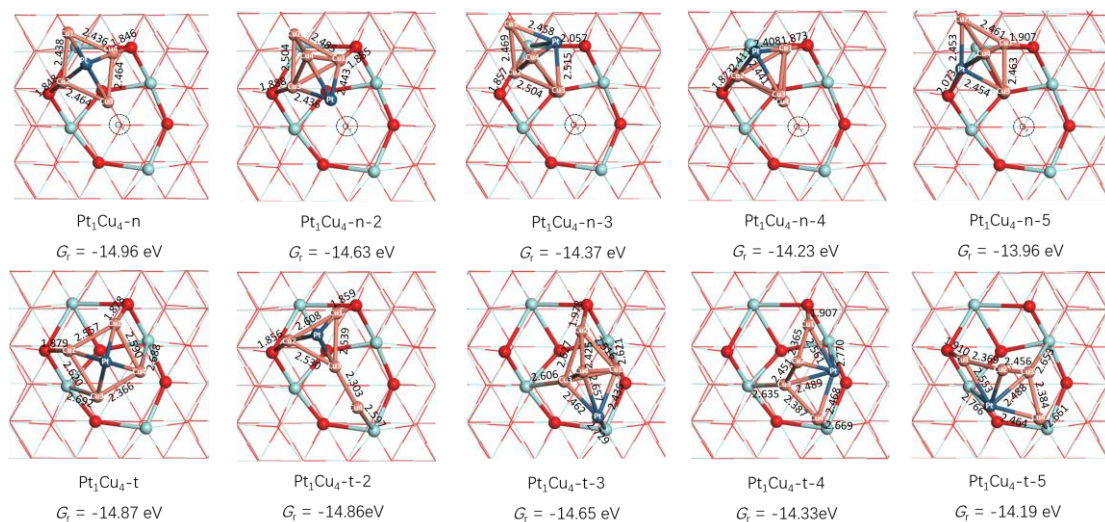

(a)

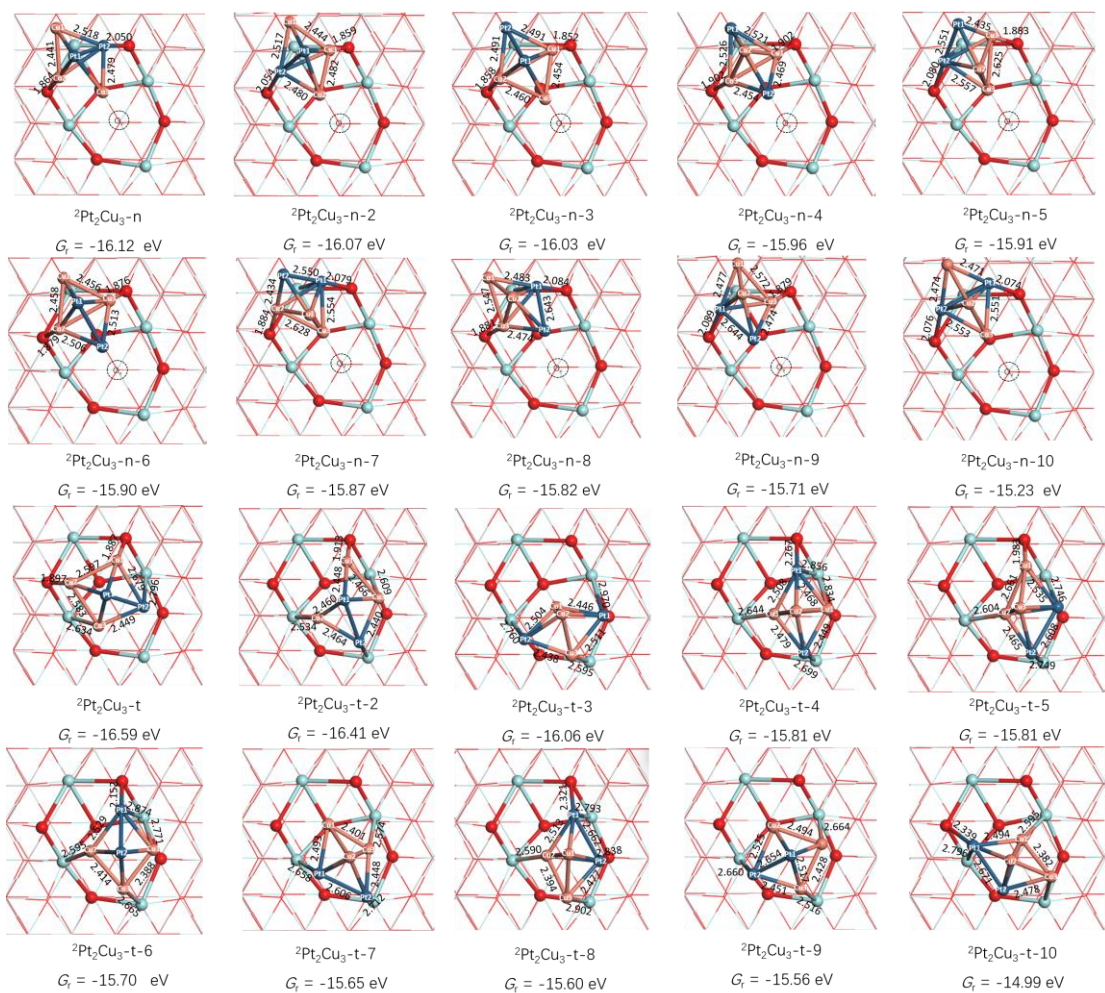

(b)

Continue Figure S10

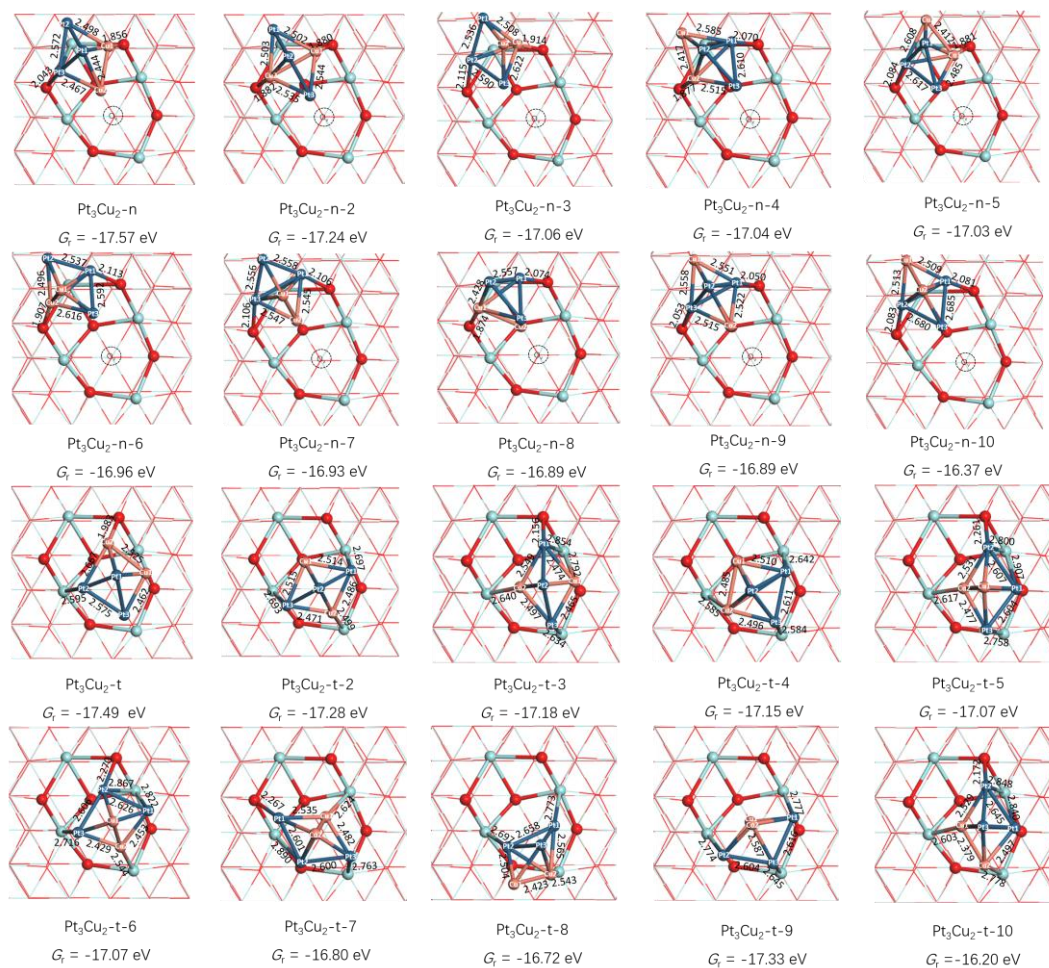

(c)

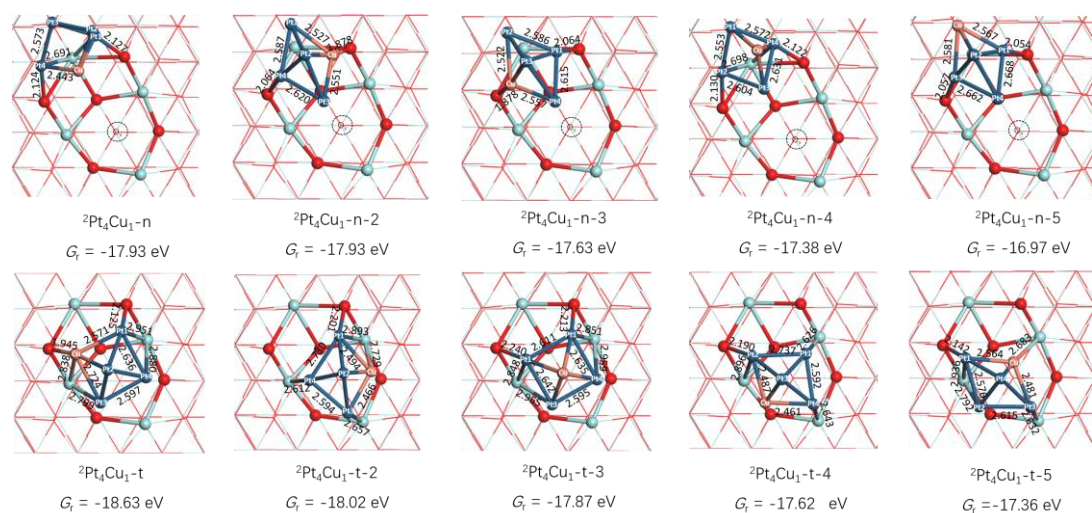

(d)

**Figure S10** The geometries and relative Gibbs free energies ( $G_r$ ) for Pt<sub>x</sub>Cu<sub>y</sub> ( $x + y = 5$ ) cluster on the t-ZrO<sub>2</sub>(101) surface. (a)Pt<sub>1</sub>Cu<sub>4</sub>/ZrO<sub>2</sub>(101), (b)Pt<sub>2</sub>Cu<sub>3</sub>/ZrO<sub>2</sub>(101), (c)Pt<sub>3</sub>Cu<sub>2</sub>/ZrO<sub>2</sub>(101), (d)Pt<sub>4</sub>Cu<sub>1</sub>/ZrO<sub>2</sub>(101). The superscript prefixes "2" is used to indicate the doublet state. The black numbers represent distances (Å).

**Table S1.** Zero-point vibrational energies (*ZPVE*, hartree), sum of electronic energies in the gas phase ( $E_{t,g}$ , hartree), thermal correction to Gibbs free energies ( $G_0$ , hartree), sum of electronic and thermal Gibbs free energies ( $G_c$ , hartree) and the relative Gibbs free energies ( $G_r$ , eV) of t-ZrO<sub>2</sub>(101), t-ZrO<sub>2</sub>(101)-Ov(O3), and t-ZrO<sub>2</sub>(101)-Ov(O4).

| Species                          | <i>ZPVE</i> | $E_{t,g}$  | $G_0$   | $G_c$      | $G_r$ |
|----------------------------------|-------------|------------|---------|------------|-------|
| t-ZrO <sub>2</sub> (101)         | 0.31112     | -743.16627 | 0.13373 | -743.03254 | 0.00  |
| t-ZrO <sub>2</sub> (101)-Ov(O-3) | 0.30997     | -668.07474 | 0.11374 | -667.96099 | -1.47 |
| t-ZrO <sub>2</sub> (101)-Ov(O-4) | 0.30034     | -667.43282 | 0.12074 | -667.31208 | 16.21 |

**Table S2.** Zero-point vibrational energies (*ZPVE*, hartree), sum of electronic energies in the gas phase ( $E_{t,g}$ , hartree), thermal correction to Gibbs free energies ( $G_0$ , hartree), sum of electronic and thermal Gibbs free energies ( $G_c$ , hartree) and the relative Gibbs free energies ( $G_r$ , eV) of  $Pt_x$  and  $Cu_y$  ( $x, y = 1 \sim 5$ ).

| Species         | multiplicity | <i>ZPVE</i> | $E_{t,g}$   | $G_0$    | $G_c$       | $G_r$ |
|-----------------|--------------|-------------|-------------|----------|-------------|-------|
| Pt <sub>1</sub> | Triplet      | 0.00000     | -195.21930  | 0.00000  | 0.00000     | 0.00  |
|                 | Quintet      | 0.00000     | -195.00483  | 0.00000  | 0.00000     | 5.84  |
| Pt <sub>2</sub> | Singlet      | 0.00065     | -390.55032  | -0.01888 | -390.56920  | 0.00  |
|                 | Triplet      | 0.00065     | -390.55017  | -0.01888 | -390.56906  | 0.00  |
| Pt <sub>3</sub> | Singlet      | 0.00122     | -585.88507  | -0.02971 | -585.91478  | 0.00  |
|                 | Triplet      | 0.00121     | -585.88443  | -0.02986 | -585.91429  | 0.01  |
| Pt <sub>4</sub> | Singlet      | 0.00181     | -781.21907  | -0.04680 | -781.26587  | 0.00  |
|                 | Triplet      | 0.00181     | -781.21906  | -0.04678 | -781.26584  | 0.00  |
| Pt <sub>5</sub> | Singlet      | 0.00253     | -976.56379  | -0.07125 | -976.63503  | 0.00  |
|                 | Triplet      | 0.00253     | -976.56187  | -0.07139 | -976.63327  | 0.05  |
| Cu <sub>1</sub> | double       | 0.00000     | -222.41593  | 0.00000  | 0.00000     | 0.00  |
|                 | quartet      | 0.00000     | -222.20241  | 0.00000  | 0.00000     | 5.81  |
| Cu <sub>2</sub> | singlet      | 0.00102     | -444.91179  | -0.01466 | -444.92645  | 0.00  |
|                 | triplet      | 0.00072     | -444.85698  | -0.00852 | -444.86550  | 1.66  |
| Cu <sub>3</sub> | double       | 0.00180     | -667.38270  | -0.02150 | -667.40419  | 0.00  |
|                 | quartet      | 0.00216     | -667.32961  | -0.01841 | -667.34802  | 1.53  |
| Cu <sub>4</sub> | singlet      | 0.00289     | -889.86414  | -0.03363 | -889.89777  | 0.00  |
|                 | triplet      | 0.00287     | -889.86372  | -0.03370 | -889.89742  | 0.00  |
| Cu <sub>5</sub> | double       | 0.00331     | -1112.38636 | -0.04331 | -1112.42967 | 0.00  |
|                 | quartet      | 0.00387     | -1112.36314 | -0.04704 | -1112.41018 | 0.53  |

**Table S3.** Zero-point vibrational energies (*ZPVE*, hartree), sum of electronic energies in the gas phase ( $E_{t,g}$ , hartree), thermal correction to Gibbs free energies ( $G_0$ , hartree), sum of electronic and thermal Gibbs free energies ( $G_c$ , hartree) and the relative Gibbs free energies ( $G_r$ , eV) of  $\text{Pt}_x/\text{ZrO}_2(101)$  ( $x = 1 \sim 5$ ).

| Species                    | multiplicity         | <i>ZPVE</i> | $E_{t,g}$   | $G_0$   | $G_c$       | $G_r$  |
|----------------------------|----------------------|-------------|-------------|---------|-------------|--------|
| $\text{Pt}_1/\text{ZrO}_2$ | Pt <sub>1</sub> -n   | 0.31207     | -863.38661  | 0.10500 | -863.28162  | -2.76  |
|                            | Pt <sub>1</sub> -n-2 | 0.31219     | -863.38065  | 0.11359 | -863.26706  | -2.36  |
|                            | Pt <sub>1</sub> -t   | 0.31015     | -863.36328  | 0.11025 | -863.25302  | -1.98  |
| $\text{Pt}_2/\text{ZrO}_2$ | Pt <sub>2</sub> -n   | 0.31423     | -1058.71334 | 0.09483 | -1058.61851 | -5.96  |
|                            | Pt <sub>2</sub> -n-2 | 0.31333     | -1058.69987 | 0.09740 | -1058.60247 | -5.52  |
|                            | Pt <sub>2</sub> -n-3 | 0.30987     | -1058.69417 | 0.10099 | -1058.59317 | -5.27  |
|                            | Pt <sub>2</sub> -t   | 0.31077     | -1058.71123 | 0.10206 | -1058.60916 | -5.70  |
| $\text{Pt}_3/\text{ZrO}_2$ | Pt <sub>3</sub> -n   | 0.31583     | -1254.09092 | 0.08477 | -1254.00615 | -10.54 |
|                            | Pt <sub>3</sub> -t   | 0.31094     | -1254.07753 | 0.06115 | -1254.01638 | -10.82 |
|                            | Pt <sub>3</sub> -t-2 | 0.31064     | -1254.05769 | 0.07962 | -1253.97807 | -9.77  |
|                            | Pt <sub>3</sub> -t-3 | 0.31176     | -1254.05609 | 0.08407 | -1253.97202 | -9.61  |
|                            | Pt <sub>3</sub> -t-4 | 0.31209     | -1254.05714 | 0.08798 | -1253.96915 | -9.53  |
| $\text{Pt}_4/\text{ZrO}_2$ | Pt <sub>4</sub> -n   | 0.31689     | -1449.42642 | 0.05745 | -1449.36896 | -14.44 |
|                            | Pt <sub>4</sub> -n-2 | 0.31420     | -1449.39396 | 0.06773 | -1449.32623 | -13.28 |
|                            | Pt <sub>4</sub> -t   | 0.31223     | -1449.42589 | 0.04685 | -1449.37903 | -14.72 |
| $\text{Pt}_5/\text{ZrO}_2$ | Pt <sub>5</sub> -n   | 0.31759     | -1644.78567 | 0.03639 | -1644.74928 | -18.82 |
|                            | Pt <sub>5</sub> -n-2 | 0.31748     | -1644.78607 | 0.04174 | -1644.74433 | -18.69 |
|                            | Pt <sub>5</sub> -t   | 0.31320     | -1644.80696 | 0.03114 | -1644.77582 | -19.55 |

**Table S4.** The binding energies ( $G_{BE}$ , eV), the clusters deformation energies ( $\Delta G_{def,Pt_x}$ , eV), the t-ZrO<sub>2</sub> (101) deformation energies ( $\Delta G_{def,ZrO_2}$ , eV), the metal-metal bond energy ( $\Delta G_{bond,Pt_x}$ , eV), the metal-support interaction energies ( $G_{MS}$ , eV), the nucleation energies ( $G_{nuc}$ , eV), and the charge transfer (ET) for the most stable configurations of Pt<sub>x</sub>/ZrO<sub>2</sub>(101) ( $x = 1 \sim 5$ ).

| Configuration                     | Species            | $G_{BE}$ | $\Delta G_{def,Pt_x}$ | $\Delta G_{def,ZrO_2}$ | $\Delta G_{bond,Pt_x}$ | $G_{MS}$ | $G_{nuc}$ | ET     |
|-----------------------------------|--------------------|----------|-----------------------|------------------------|------------------------|----------|-----------|--------|
| Pt <sub>1</sub> /ZrO <sub>2</sub> | Pt <sub>1</sub> -n | -2.76    | 0.00                  | 0.52                   | 0.00                   | -3.27    | 0.00      | 0.119  |
|                                   | Pt <sub>1</sub> -t | -1.98    | 0.00                  | 0.91                   | 0.00                   | -2.89    | 0.00      | -0.089 |
| Pt <sub>2</sub> /ZrO <sub>2</sub> | Pt <sub>2</sub> -n | -2.98    | 0.06                  | 0.77                   | -1.78                  | -1.97    | -0.44     | -0.001 |
|                                   | Pt <sub>2</sub> -t | -2.85    | 0.05                  | 0.99                   | -1.78                  | -2.07    | -0.19     | -0.032 |
| Pt <sub>3</sub> /ZrO <sub>2</sub> | Pt <sub>3</sub> -n | -3.51    | 0.08                  | 0.70                   | -2.33                  | -1.88    | -1.82     | -0.08  |
|                                   | Pt <sub>3</sub> -t | -3.61    | -0.17                 | 0.04                   | -2.33                  | -1.32    | -2.36     | 0.128  |
| Pt <sub>4</sub> /ZrO <sub>2</sub> | Pt <sub>4</sub> -n | -3.61    | 0.39                  | 0.85                   | -2.64                  | -1.82    | -1.15     | 0.045  |
|                                   | Pt <sub>4</sub> -t | -3.68    | -0.01                 | -0.01                  | -2.64                  | -1.03    | -1.14     | 0.049  |
| Pt <sub>5</sub> /ZrO <sub>2</sub> | Pt <sub>5</sub> -n | -3.76    | 0.28                  | 0.82                   | -2.93                  | -1.65    | -1.62     | 0.028  |
|                                   | Pt <sub>5</sub> -t | -3.91    | 0.24                  | 0.12                   | -2.93                  | -1.10    | -2.07     | 0.049  |

**Table S5.** Zero-point vibrational energies (*ZPVE*, hartree), sum of electronic energies in the gas phase ( $E_{t,g}$ , hartree), thermal correction to Gibbs free energies ( $G_0$ , hartree), sum of electronic and thermal Gibbs free energies ( $G_c$ , hartree) and the relative Gibbs free energies ( $G_r$ , eV) of  $\text{Cu}_y/\text{ZrO}_2(101)$  ( $y = 1 \sim 5$ ).

| Species                    | multiplicity             | <i>ZPVE</i> | $E_{t,g}$   | $G_0$   | $G_c$       | $G_r$  |
|----------------------------|--------------------------|-------------|-------------|---------|-------------|--------|
| $\text{Cu}_1/\text{ZrO}_2$ | $\text{Cu}_1\text{-n}$   | 0.31233     | -890.54549  | 0.11651 | -890.42898  | -1.42  |
|                            | $\text{Cu}_1\text{-n-2}$ | 0.31218     | -890.54005  | 0.11502 | -890.42503  | -1.31  |
| $\text{Cu}_2/\text{ZrO}_2$ | $\text{Cu}_2\text{-n}$   | 0.31539     | -1113.05716 | 0.10516 | -1112.95201 | -4.33  |
|                            | $\text{Cu}_2\text{-t}$   | 0.31090     | -1113.02325 | 0.10044 | -1112.92281 | -3.54  |
| $\text{Cu}_3/\text{ZrO}_2$ | $\text{Cu}_3\text{-n}$   | 0.31524     | -1335.56015 | 0.08484 | -1335.47531 | -7.25  |
|                            | $\text{Cu}_3\text{-n-2}$ | 0.31450     | -1335.54049 | 0.09578 | -1335.44472 | -6.42  |
|                            | $\text{Cu}_3\text{-t}$   | 0.31206     | -1335.53036 | 0.08015 | -1335.45021 | -6.57  |
| $\text{Cu}_4/\text{ZrO}_2$ | $\text{Cu}_4\text{-n}$   | 0.31766     | -1558.07292 | 0.08267 | -1557.99025 | -9.95  |
|                            | $\text{Cu}_4\text{-n-2}$ | 0.31781     | -1558.04506 | 0.08333 | -1557.96173 | -9.17  |
|                            | $\text{Cu}_4\text{-t}$   | 0.31266     | -1558.04574 | 0.06869 | -1557.97705 | -9.59  |
|                            | $\text{Cu}_4\text{-t-2}$ | 0.31688     | -1558.05004 | 0.07516 | -1557.97488 | -9.53  |
| $\text{Cu}_5/\text{ZrO}_2$ | $\text{Cu}_5\text{-n}$   | 0.31776     | -1780.57604 | 0.06572 | -1780.51032 | -12.78 |
|                            | $\text{Cu}_5\text{-n-2}$ | 0.31878     | -1780.57230 | 0.07097 | -1780.50133 | -12.54 |
|                            | $\text{Cu}_5\text{-t}$   | 0.31428     | -1780.56122 | 0.05764 | -1780.50358 | -12.60 |
|                            | $\text{Cu}_5\text{-t-2}$ | 0.31471     | -1780.54978 | 0.06879 | -1780.48098 | -11.98 |

**Table S6.** The binding energies ( $G_{BE}$ , eV), the clusters deformation energies ( $\Delta G_{def,Cu_y}$ , eV), the t-ZrO<sub>2</sub>(101) deformation energies ( $\Delta G_{def,ZrO_2}$ , eV), the metal-metal bond energy ( $\Delta G_{bond,Cu_y}$ , eV), the metal-support interaction energies ( $G_{MS}$ , eV), the nucleation energies ( $G_{nuc}$ , eV), and the charge transfer (ET) for the most stable configurations of Cu<sub>y</sub>/ZrO<sub>2</sub>(101) ( $y = 1 \sim 5$ ).

| Configuration                     | Species            | $G_{BE}$ | $\Delta G_{def,Cu_y}$ | $\Delta G_{def,ZrO_2}$ | $\Delta G_{bond,Cu_y}$ | $G_{MS}$ | $G_{nuc}$ | ET    |
|-----------------------------------|--------------------|----------|-----------------------|------------------------|------------------------|----------|-----------|-------|
| Cu <sub>1</sub> /ZrO <sub>2</sub> | Cu <sub>1</sub> -n | -1.42    | 0.00                  | 0.85                   | 0.00                   | -2.26    | 0.00      | 0.173 |
| Cu <sub>2</sub> /ZrO <sub>2</sub> | Cu <sub>2</sub> -n | -2.17    | 0.04                  | 0.96                   | -1.29                  | -1.84    | -1.50     | 0.257 |
|                                   | Cu <sub>2</sub> -t | -1.77    | 0.13                  | 0.87                   | -1.29                  | -1.35    | -0.70     | 0.132 |
| Cu <sub>3</sub> /ZrO <sub>2</sub> | Cu <sub>3</sub> -n | -2.42    | 0.10                  | 1.08                   | -1.42                  | -2.08    | -1.51     | 0.312 |
|                                   | Cu <sub>3</sub> -t | -2.19    | -0.24                 | -0.04                  | -1.42                  | -0.73    | -1.62     | 0.201 |
| Cu <sub>4</sub> /ZrO <sub>2</sub> | Cu <sub>4</sub> -n | -2.49    | 0.19                  | 0.84                   | -1.59                  | -1.74    | -1.28     | 0.394 |
|                                   | Cu <sub>4</sub> -t | -2.40    | -0.57                 | 0.21                   | -1.59                  | -1.02    | -1.60     | 0.225 |
| Cu <sub>5</sub> /ZrO <sub>2</sub> | Cu <sub>5</sub> -n | -2.56    | -0.10                 | 0.95                   | -1.90                  | -1.60    | -1.42     | 0.250 |
|                                   | Cu <sub>5</sub> -t | -2.52    | 0.17                  | 0.53                   | -1.90                  | -1.15    | -1.59     | 0.228 |

**Table S7.** Zero-point vibrational energies (*ZPVE*, hartree), sum of electronic energies in the gas phase ( $E_{t,g}$ , hartree), thermal correction to Gibbs free energies ( $G_0$ , hartree), sum of electronic and thermal Gibbs free energies ( $G_c$ , hartree) and the relative Gibbs free energies ( $G_r$ , eV) of  $Pt_xCu_y$  ( $x + y = 2 \sim 5$ ) clusters in the gas phase.

| Species                         | multiplicity | <i>ZPVE</i> | $E_{t,g}$   | $G_0$    | $G_c$       | $G_r$ |
|---------------------------------|--------------|-------------|-------------|----------|-------------|-------|
| Pt <sub>1</sub> Cu <sub>1</sub> | double       | 0.00061     | -417.73087  | -0.01232 | -417.74320  | 0.00  |
|                                 | quartet      | 0.00055     | -417.67738  | -0.00996 | -417.68734  | 1.52  |
| Pt <sub>2</sub> Cu <sub>1</sub> | double       | 0.00149     | -613.06326  | -0.03544 | -613.09870  | 0.00  |
|                                 | quartet      | 0.00150     | -613.04220  | -0.03482 | -613.07702  | 0.59  |
| Pt <sub>1</sub> Cu <sub>2</sub> | singlet      | 0.00151     | -640.23379  | -0.02580 | -640.25959  | 0.00  |
|                                 | triplet      | 0.00116     | -640.21271  | -0.01086 | -640.22357  | 0.98  |
| Pt <sub>3</sub> Cu <sub>1</sub> | double       | 0.00207     | -808.39944  | -0.03319 | -808.43263  | 0.00  |
|                                 | quartet      | 0.00196     | -808.38838  | -0.04615 | -808.43454  | -0.05 |
| Pt <sub>1</sub> Cu <sub>3</sub> | double       | 0.00240     | -862.72592  | -0.05147 | -862.77739  | 0.00  |
|                                 | quartet      | 0.00241     | -862.69685  | -0.03840 | -862.73524  | 1.15  |
| Pt <sub>2</sub> Cu <sub>2</sub> | singlet      | 0.00232     | -835.57160  | -0.04231 | -835.61392  | 0.00  |
|                                 | triplet      | 0.00229     | -835.56139  | -0.04170 | -835.60309  | 0.29  |
| Pt <sub>1</sub> Cu <sub>4</sub> | singlet      | 0.00347     | -1085.23644 | -0.05410 | -1085.29055 | 0.00  |
|                                 | triplet      | 0.00335     | -1085.23222 | -0.04292 | -1085.27514 | 0.42  |
| Pt <sub>2</sub> Cu <sub>3</sub> | double       | 0.00303     | -1058.08163 | -0.04897 | -1058.13059 | 0.00  |
|                                 | quartet      | 0.00322     | -1058.06828 | -0.05699 | -1058.12528 | 0.14  |
| Pt <sub>3</sub> Cu <sub>2</sub> | singlet      | 0.00327     | -1030.93191 | -0.05414 | -1030.98605 | 0.00  |
|                                 | triplet      | 0.00328     | -1030.93023 | -0.05442 | -1030.98465 | 0.04  |
| Pt <sub>4</sub> Cu <sub>1</sub> | double       | 0.00285     | -1003.74621 | -0.06011 | -1003.80633 | 0.00  |
|                                 | quartet      | 0.00289     | -1003.74847 | -0.05962 | -1003.80810 | -0.05 |

**Table S8.** Zero-point vibrational energies (ZPVE, hartree), sum of electronic energies in the gas phase ( $E_{t,g}$ , hartree), thermal correction to Gibbs free energies ( $G_0$ , hartree), sum of electronic and thermal Gibbs free energies ( $G_c$ , hartree) and the relative Gibbs free energies ( $G_r$ , eV) of  $Pt_xCu_y/ZrO_2$  ( $x + y = 2 \sim 5$ ).

| Species                                           | multiplicity                                      | ZPVE                               | $E_{t,g}$   | $G_0$       | $G_c$       | $G_r$       |
|---------------------------------------------------|---------------------------------------------------|------------------------------------|-------------|-------------|-------------|-------------|
| Pt <sub>1</sub> Cu <sub>1</sub> /ZrO <sub>2</sub> | Pt <sub>1</sub> Cu <sub>1</sub> -n                | 0.31475                            | -1085.90255 | 0.09156     | -1085.81099 | -5.84       |
|                                                   | Pt <sub>1</sub> Cu <sub>1</sub> -n-2              | 0.31472                            | -1085.90151 | 0.10204     | -1085.79948 | -5.53       |
|                                                   | Pt <sub>1</sub> Cu <sub>1</sub> -t                | 0.31033                            | -1085.87217 | 0.09939     | -1085.77278 | -4.80       |
| Pt <sub>1</sub> Cu <sub>2</sub> /ZrO <sub>2</sub> | Pt <sub>1</sub> Cu <sub>2</sub> -n                | 0.31677                            | -1308.43117 | 0.08753     | -1308.34364 | -9.02       |
|                                                   | Pt <sub>1</sub> Cu <sub>2</sub> -n-2              | 0.31625                            | -1308.42066 | 0.08693     | -1308.33373 | -8.75       |
|                                                   | Pt <sub>1</sub> Cu <sub>2</sub> -n-3              | 0.31630                            | -1308.42002 | 0.08954     | -1308.33048 | -8.66       |
|                                                   | Pt <sub>1</sub> Cu <sub>2</sub> -t                | 0.31170                            | -1308.41202 | 0.07362     | -1308.33840 | -8.88       |
|                                                   | Pt <sub>1</sub> Cu <sub>2</sub> -t-2              | 0.31181                            | -1308.40411 | 0.08637     | -1308.31773 | -8.32       |
|                                                   | Pt <sub>1</sub> Cu <sub>2</sub> -t-3              | 0.31180                            | -1308.40442 | 0.08719     | -1308.31723 | -8.30       |
|                                                   | Pt <sub>2</sub> Cu <sub>1</sub> /ZrO <sub>2</sub> | Pt <sub>2</sub> Cu <sub>1</sub> -n | 0.31612     | -1281.24815 | 0.08474     | -1281.16341 |
| Pt <sub>2</sub> Cu <sub>1</sub> -n-2              | 0.31613                                           | -1281.24591                        | 0.08398     | -1281.16193 | -9.43       |             |
| Pt <sub>2</sub> Cu <sub>1</sub> -n-3              | 0.31611                                           | -1281.23539                        | 0.08456     | -1281.15083 | -9.12       |             |
| Pt <sub>2</sub> Cu <sub>1</sub> -t                | 0.31123                                           | -1281.24182                        | 0.07336     | -1281.16846 | -9.60       |             |
| Pt <sub>2</sub> Cu <sub>1</sub> -t-2              | 0.31132                                           | -1281.24143                        | 0.07317     | -1281.16826 | -9.60       |             |
| Pt <sub>2</sub> Cu <sub>1</sub> -t-3              | 0.31116                                           | -1281.23991                        | 0.07659     | -1281.16332 | -9.46       |             |
| Pt <sub>1</sub> Cu <sub>3</sub> /ZrO <sub>2</sub> | Pt <sub>1</sub> Cu <sub>3</sub> -n                | 0.31708                            | -1530.92188 | 0.07763     | -1530.84425 | -11.32      |
|                                                   | Pt <sub>1</sub> Cu <sub>3</sub> -n-2              | 0.31763                            | -1530.92282 | 0.08150     | -1530.84131 | -11.24      |
|                                                   | Pt <sub>1</sub> Cu <sub>3</sub> -n-3              | 0.31685                            | -1530.90294 | 0.07224     | -1530.83069 | -10.96      |
|                                                   | Pt <sub>1</sub> Cu <sub>3</sub> -n-4              | 0.31693                            | -1530.90333 | 0.08208     | -1530.82125 | -10.70      |
|                                                   | Pt <sub>1</sub> Cu <sub>3</sub> -t                | 0.31280                            | -1530.90373 | 0.06180     | -1530.84192 | -11.26      |
|                                                   | Pt <sub>1</sub> Cu <sub>3</sub> -t-2              | 0.31297                            | -1530.89643 | 0.06237     | -1530.83405 | -11.05      |
|                                                   | Pt <sub>1</sub> Cu <sub>3</sub> -t-3              | 0.31250                            | -1530.90147 | 0.07259     | -1530.82888 | -10.91      |
|                                                   | Pt <sub>1</sub> Cu <sub>3</sub> -t-4              | 0.31253                            | -1530.89901 | 0.07177     | -1530.82724 | -10.86      |
|                                                   | Pt <sub>3</sub> Cu <sub>1</sub> /ZrO <sub>2</sub> | Pt <sub>3</sub> Cu <sub>1</sub> -n | 0.31709     | -1476.59827 | 0.06781     | -1476.53045 |
| Pt <sub>3</sub> Cu <sub>1</sub> -n-2              | 0.31712                                           | -1476.59797                        | 0.06811     | -1476.52985 | -13.47      |             |
| Pt <sub>3</sub> Cu <sub>1</sub> -n-3              | 0.31674                                           | -1476.59735                        | 0.06884     | -1476.52851 | -13.43      |             |
| Pt <sub>3</sub> Cu <sub>1</sub> -n-4              | 0.31657                                           | -1476.58683                        | 0.06594     | -1476.52090 | -13.23      |             |
| Pt <sub>3</sub> Cu <sub>1</sub> -t                | 0.31259                                           | -1476.59431                        | 0.05197     | -1476.54234 | -13.81      |             |
| Pt <sub>3</sub> Cu <sub>1</sub> -t-2              | 0.31260                                           | -1476.60238                        | 0.06097     | -1476.54141 | -13.78      |             |
| Pt <sub>3</sub> Cu <sub>1</sub> -t-3              | 0.31234                                           | -1476.60557                        | 0.06647     | -1476.53910 | -13.72      |             |
| Pt <sub>3</sub> Cu <sub>1</sub> -t-4              | 0.31200                                           | -1476.59438                        | 0.05692     | -1476.53746 | -13.68      |             |
| Pt <sub>2</sub> Cu <sub>2</sub> /ZrO <sub>2</sub> | Pt <sub>2</sub> Cu <sub>2</sub> -n                | 0.31702                            | -1503.76544 | 0.06644     | -1503.69900 | -12.72      |
|                                                   | Pt <sub>2</sub> Cu <sub>2</sub> -n-2              | 0.31716                            | -1503.76549 | 0.06903     | -1503.69646 | -12.65      |
|                                                   | Pt <sub>2</sub> Cu <sub>2</sub> -n-3              | 0.31685                            | -1503.76122 | 0.06531     | -1503.69591 | -12.64      |
|                                                   | Pt <sub>2</sub> Cu <sub>2</sub> -n-4              | 0.31749                            | -1503.77170 | 0.07645     | -1503.69526 | -12.62      |
|                                                   | Pt <sub>2</sub> Cu <sub>2</sub> -n-5              | 0.31696                            | -1503.76114 | 0.06723     | -1503.69390 | -12.58      |
|                                                   | Pt <sub>2</sub> Cu <sub>2</sub> -n-6              | 0.31680                            | -1503.74664 | 0.07006     | -1503.67658 | -12.11      |
|                                                   | Pt <sub>2</sub> Cu <sub>2</sub> -t                | 0.31320                            | -1503.77339 | 0.06482     | -1503.70857 | -12.98      |

Continue Table S8

| Species                         | multiplicity                          | ZPVE    | $E_{t,g}$   | $G_0$   | $G_c$       | $G_r$  |
|---------------------------------|---------------------------------------|---------|-------------|---------|-------------|--------|
|                                 | Pt <sub>2</sub> Cu <sub>2</sub> -t-2  | 0.31246 | -1503.76636 | 0.07012 | -1503.69625 | -12.65 |
|                                 | Pt <sub>2</sub> Cu <sub>2</sub> -t-3  | 0.31243 | -1503.75430 | 0.06426 | -1503.69004 | -12.48 |
|                                 | Pt <sub>2</sub> Cu <sub>2</sub> -t-4  | 0.31233 | -1503.75412 | 0.07700 | -1503.67712 | -12.13 |
|                                 | Pt <sub>2</sub> Cu <sub>2</sub> -t-5  | 0.31283 | -1503.74506 | 0.06915 | -1503.67591 | -12.09 |
|                                 | Pt <sub>2</sub> Cu <sub>2</sub> -t-6  | 0.31287 | -1503.74556 | 0.07066 | -1503.67490 | -12.07 |
| Pt <sub>1</sub> Cu <sub>4</sub> | Pt <sub>1</sub> Cu <sub>4</sub> -n    | 0.31806 | -1753.45559 | 0.06178 | -1753.39382 | -14.96 |
|                                 | Pt <sub>1</sub> Cu <sub>4</sub> -n-2  | 0.31657 | -1753.44502 | 0.06348 | -1753.38153 | -14.63 |
|                                 | Pt <sub>1</sub> Cu <sub>4</sub> -n-3  | 0.31844 | -1753.43840 | 0.06622 | -1753.37218 | -14.37 |
|                                 | Pt <sub>1</sub> Cu <sub>4</sub> -n-4  | 0.31822 | -1753.43364 | 0.06676 | -1753.36688 | -14.23 |
|                                 | Pt <sub>1</sub> Cu <sub>4</sub> -n-5  | 0.31811 | -1753.42184 | 0.06496 | -1753.35688 | -13.96 |
|                                 | Pt <sub>1</sub> Cu <sub>4</sub> -t    | 0.31598 | -1753.45699 | 0.06656 | -1753.39043 | -14.87 |
|                                 | Pt <sub>1</sub> Cu <sub>4</sub> -t-2  | 0.31667 | -1753.44561 | 0.05564 | -1753.38997 | -14.86 |
|                                 | Pt <sub>1</sub> Cu <sub>4</sub> -t-3  | 0.31403 | -1753.44017 | 0.05762 | -1753.38255 | -14.65 |
|                                 | Pt <sub>1</sub> Cu <sub>4</sub> -t-4  | 0.31396 | -1753.43389 | 0.06321 | -1753.37068 | -14.33 |
|                                 | Pt <sub>1</sub> Cu <sub>4</sub> -t-5  | 0.31436 | -1753.42169 | 0.05638 | -1753.36531 | -14.19 |
| Pt <sub>2</sub> Cu <sub>3</sub> | Pt <sub>2</sub> Cu <sub>3</sub> -n    | 0.31805 | -1726.29197 | 0.05205 | -1726.23991 | -16.12 |
|                                 | Pt <sub>2</sub> Cu <sub>3</sub> -n-2  | 0.31816 | -1726.29243 | 0.05442 | -1726.23800 | -16.07 |
|                                 | Pt <sub>2</sub> Cu <sub>3</sub> -n-3  | 0.31779 | -1726.28928 | 0.05293 | -1726.23634 | -16.03 |
|                                 | Pt <sub>2</sub> Cu <sub>3</sub> -n-4  | 0.31609 | -1726.29426 | 0.06043 | -1726.23383 | -15.96 |
|                                 | Pt <sub>2</sub> Cu <sub>3</sub> -n-5  | 0.31797 | -1726.28654 | 0.05440 | -1726.23214 | -15.91 |
|                                 | Pt <sub>2</sub> Cu <sub>3</sub> -n-6  | 0.31669 | -1726.29515 | 0.06344 | -1726.23170 | -15.90 |
|                                 | Pt <sub>2</sub> Cu <sub>3</sub> -n-7  | 0.31804 | -1726.28630 | 0.05571 | -1726.23059 | -15.87 |
|                                 | Pt <sub>2</sub> Cu <sub>3</sub> -n-8  | 0.31734 | -1726.27735 | 0.04849 | -1726.22886 | -15.82 |
|                                 | Pt <sub>2</sub> Cu <sub>3</sub> -n-9  | 0.31777 | -1726.27787 | 0.05320 | -1726.22466 | -15.71 |
|                                 | Pt <sub>2</sub> Cu <sub>3</sub> -n-10 | 0.31774 | -1726.26902 | 0.06192 | -1726.20710 | -15.23 |
|                                 | Pt <sub>2</sub> Cu <sub>3</sub> -t    | 0.31502 | -1726.30813 | 0.05098 | -1726.25715 | -16.59 |
|                                 | Pt <sub>2</sub> Cu <sub>3</sub> -t-2  | 0.31450 | -1726.30063 | 0.05032 | -1726.25031 | -16.41 |
|                                 | Pt <sub>2</sub> Cu <sub>3</sub> -t-3  | 0.31300 | -1726.29205 | 0.05441 | -1726.23764 | -16.06 |
|                                 | Pt <sub>2</sub> Cu <sub>3</sub> -t-4  | 0.31327 | -1726.28074 | 0.05222 | -1726.22852 | -15.81 |
|                                 | Pt <sub>2</sub> Cu <sub>3</sub> -t-5  | 0.31340 | -1726.28440 | 0.05605 | -1726.22835 | -15.81 |
|                                 | Pt <sub>2</sub> Cu <sub>3</sub> -t-6  | 0.31392 | -1726.27250 | 0.04811 | -1726.22439 | -15.70 |
|                                 | Pt <sub>2</sub> Cu <sub>3</sub> -t-7  | 0.31304 | -1726.28000 | 0.05732 | -1726.22269 | -15.65 |
|                                 | Pt <sub>2</sub> Cu <sub>3</sub> -t-8  | 0.31275 | -1726.27175 | 0.05121 | -1726.22054 | -15.60 |
|                                 | Pt <sub>2</sub> Cu <sub>3</sub> -t-9  | 0.31347 | -1726.27462 | 0.05539 | -1726.21924 | -15.56 |
|                                 | Pt <sub>2</sub> Cu <sub>3</sub> -t-10 | 0.31292 | -1726.25796 | 0.05962 | -1726.19834 | -14.99 |
| Pt <sub>3</sub> Cu <sub>2</sub> | Pt <sub>3</sub> Cu <sub>2</sub> -n    | 0.31785 | -1699.13564 | 0.03937 | -1699.09627 | -17.57 |
|                                 | Pt <sub>3</sub> Cu <sub>2</sub> -n-2  | 0.31709 | -1699.14159 | 0.05720 | -1699.08439 | -17.24 |
|                                 | Pt <sub>3</sub> Cu <sub>2</sub> -n-3  | 0.31788 | -1699.12795 | 0.05025 | -1699.07770 | -17.06 |
|                                 | Pt <sub>3</sub> Cu <sub>2</sub> -n-4  | 0.31754 | -1699.12710 | 0.05008 | -1699.07703 | -17.04 |

Continue Table S8

| Species                         | multiplicity                          | ZPVE    | $E_{t,g}$   | $G_0$   | $G_c$       | $G_r$  |
|---------------------------------|---------------------------------------|---------|-------------|---------|-------------|--------|
|                                 | Pt <sub>3</sub> Cu <sub>2</sub> -n-5  | 0.31747 | -1699.12799 | 0.05125 | -1699.07674 | -17.03 |
|                                 | Pt <sub>3</sub> Cu <sub>2</sub> -n-6  | 0.31810 | -1699.12725 | 0.05317 | -1699.07408 | -16.96 |
|                                 | Pt <sub>3</sub> Cu <sub>2</sub> -n-7  | 0.31779 | -1699.12661 | 0.05362 | -1699.07299 | -16.93 |
|                                 | Pt <sub>3</sub> Cu <sub>2</sub> -n-8  | 0.31811 | -1699.12306 | 0.05174 | -1699.07131 | -16.89 |
|                                 | Pt <sub>3</sub> Cu <sub>2</sub> -n-9  | 0.31814 | -1699.12636 | 0.05485 | -1699.07151 | -16.89 |
|                                 | Pt <sub>3</sub> Cu <sub>2</sub> -n-10 | 0.31783 | -1699.10544 | 0.05314 | -1699.05230 | -16.37 |
|                                 | Pt <sub>3</sub> Cu <sub>2</sub> -t    | 0.31385 | -1699.14189 | 0.04834 | -1699.09355 | -17.49 |
|                                 | Pt <sub>3</sub> Cu <sub>2</sub> -t-2  | 0.31323 | -1699.13360 | 0.04772 | -1699.08588 | -17.28 |
|                                 | Pt <sub>3</sub> Cu <sub>2</sub> -t-3  | 0.31367 | -1699.13763 | 0.05547 | -1699.08215 | -17.18 |
|                                 | Pt <sub>3</sub> Cu <sub>2</sub> -t-4  | 0.31320 | -1699.13027 | 0.04918 | -1699.08109 | -17.15 |
|                                 | Pt <sub>3</sub> Cu <sub>2</sub> -t-5  | 0.31285 | -1699.13126 | 0.05320 | -1699.07805 | -17.07 |
|                                 | Pt <sub>3</sub> Cu <sub>2</sub> -t-6  | 0.31299 | -1699.12035 | 0.04237 | -1699.07797 | -17.07 |
|                                 | Pt <sub>3</sub> Cu <sub>2</sub> -t-7  | 0.31292 | -1699.12851 | 0.06039 | -1699.06811 | -16.80 |
|                                 | Pt <sub>3</sub> Cu <sub>2</sub> -t-8  | 0.31346 | -1699.11011 | 0.04481 | -1699.06529 | -16.72 |
|                                 | Pt <sub>3</sub> Cu <sub>2</sub> -t-9  | 0.31316 | -1699.14201 | 0.05422 | -1699.08779 | -17.33 |
|                                 | Pt <sub>3</sub> Cu <sub>2</sub> -t-10 | 0.31327 | -1699.09968 | 0.05343 | -1699.04625 | -16.20 |
| Pt <sub>4</sub> Cu <sub>1</sub> | Pt <sub>4</sub> Cu <sub>1</sub> -n    | 0.31746 | -1671.96340 | 0.05030 | -1671.91310 | -17.93 |
|                                 | Pt <sub>4</sub> Cu <sub>1</sub> -n-2  | 0.31723 | -1671.94690 | 0.03389 | -1671.91301 | -17.93 |
|                                 | Pt <sub>4</sub> Cu <sub>1</sub> -n-3  | 0.31718 | -1671.94677 | 0.04487 | -1671.90189 | -17.63 |
|                                 | Pt <sub>4</sub> Cu <sub>1</sub> -n-4  | 0.31767 | -1671.94534 | 0.05255 | -1671.89279 | -17.38 |
|                                 | Pt <sub>4</sub> Cu <sub>1</sub> -n-5  | 0.31775 | -1671.92478 | 0.04699 | -1671.87779 | -16.97 |
|                                 | Pt <sub>4</sub> Cu <sub>1</sub> -t    | 0.31369 | -1671.98172 | 0.04285 | -1671.93887 | -18.63 |
|                                 | Pt <sub>4</sub> Cu <sub>1</sub> -t-2  | 0.31318 | -1671.96096 | 0.04461 | -1671.91634 | -18.02 |
|                                 | Pt <sub>4</sub> Cu <sub>1</sub> -t-3  | 0.31291 | -1671.96408 | 0.05323 | -1671.91085 | -17.87 |
|                                 | Pt <sub>4</sub> Cu <sub>1</sub> -t-4  | 0.31345 | -1671.94706 | 0.04542 | -1671.90165 | -17.62 |
|                                 | Pt <sub>4</sub> Cu <sub>1</sub> -t-5  | 0.31318 | -1671.94957 | 0.05757 | -1671.89200 | -17.36 |

**Table S9.** The binding energies ( $G_{BE}$ , eV), the clusters deformation energies ( $\Delta G_{\text{def,Pt}_x\text{Cu}_y}$ , eV), the t-ZrO<sub>2</sub>(101) deformation energies ( $\Delta G_{\text{def,ZrO}_2}$ , eV), the metal-metal bond energy ( $\Delta G_{\text{bond,Pt}_x\text{Cu}_y}$ , eV), the metal-support interaction energies ( $G_{MS}$ , eV), the nucleation energies ( $G_{nuc}$ , eV), and the charge transfer (ET) for the most stable configurations of Pt<sub>x</sub>Cu<sub>y</sub>/ZrO<sub>2</sub>(101) ( $x + y = 2 \sim 5$ ).

| Configuration                                     | Species                            | $G_{BE}$ | $\Delta G_{\text{def,Pt}_x\text{Cu}_y}$ | $\Delta G_{\text{def,ZrO}_2}$ | $\Delta G_{\text{bond,Pt}_x\text{Cu}_y}$ | $G_{MS}$ | $G_{nuc}$ | ET     |
|---------------------------------------------------|------------------------------------|----------|-----------------------------------------|-------------------------------|------------------------------------------|----------|-----------|--------|
| Pt <sub>1</sub> Cu <sub>1</sub> /ZrO <sub>2</sub> | Pt <sub>1</sub> Cu <sub>1</sub> -n | -2.92    | 0.27                                    | 1.03                          | -1.47                                    | -2.48    | -1.67     | 0.114  |
|                                                   | Pt <sub>1</sub> Cu <sub>1</sub> -t | -2.40    | 0.06                                    | 1.16                          | -1.47                                    | -2.09    | -0.63     | 0.036  |
| Pt <sub>1</sub> Cu <sub>2</sub> /ZrO <sub>2</sub> | Pt <sub>1</sub> Cu <sub>2</sub> -n | -3.01    | 0.19                                    | 0.83                          | -1.89                                    | -1.95    | -1.76     | 0.100  |
|                                                   | Pt <sub>1</sub> Cu <sub>2</sub> -t | -2.96    | 0.20                                    | 0.09                          | -1.89                                    | -1.16    | -2.66     | 0.135  |
| Pt <sub>2</sub> Cu <sub>1</sub> /ZrO <sub>2</sub> | Pt <sub>2</sub> Cu <sub>1</sub> -n | -3.16    | 0.25                                    | 0.80                          | -2.21                                    | -1.74    | -0.87     | -0.014 |
|                                                   | Pt <sub>2</sub> Cu <sub>1</sub> -t | -3.20    | 0.18                                    | 0.12                          | -2.21                                    | -1.10    | -2.04     | 0.141  |
| Pt <sub>1</sub> Cu <sub>3</sub> /ZrO <sub>2</sub> | Pt <sub>1</sub> Cu <sub>3</sub> -n | -2.83    | 0.24                                    | 0.83                          | -2.11                                    | -1.55    | -0.89     | 0.294  |
|                                                   | Pt <sub>1</sub> Cu <sub>3</sub> -t | -2.82    | 0.56                                    | -0.06                         | -2.11                                    | -0.64    | -0.97     | 0.157  |
| Pt <sub>3</sub> Cu <sub>1</sub> /ZrO <sub>2</sub> | Pt <sub>3</sub> Cu <sub>1</sub> -n | -3.37    | 0.23                                    | 1.35                          | -2.45                                    | -2.27    | -1.26     | 0.187  |
|                                                   | Pt <sub>3</sub> Cu <sub>1</sub> -t | -3.45    | 0.00                                    | 0.27                          | -2.45                                    | -1.27    | -1.45     | 0.122  |
| Pt <sub>2</sub> Cu <sub>2</sub> /ZrO <sub>2</sub> | Pt <sub>2</sub> Cu <sub>2</sub> -n | -3.18    | 0.51                                    | 1.05                          | -2.34                                    | -1.89    | -1.84     | 0.279  |
|                                                   | Pt <sub>2</sub> Cu <sub>2</sub> -t | -3.25    | 0.54                                    | 0.10                          | -2.34                                    | -1.01    | -1.96     | 0.091  |
| Pt <sub>1</sub> Cu <sub>4</sub> /ZrO <sub>2</sub> | Pt <sub>1</sub> Cu <sub>4</sub> -n | -2.99    | 0.30                                    | 0.90                          | -2.22                                    | -1.67    | -2.22     | 0.226  |
|                                                   | Pt <sub>1</sub> Cu <sub>4</sub> -t | -2.97    | -0.16                                   | 0.94                          | -2.22                                    | -1.69    | -2.19     | 0.262  |
| Pt <sub>2</sub> Cu <sub>3</sub> /ZrO <sub>2</sub> | Pt <sub>2</sub> Cu <sub>3</sub> -n | -3.22    | 0.45                                    | 0.87                          | -2.42                                    | -1.68    | -1.98     | 0.275  |
|                                                   | Pt <sub>2</sub> Cu <sub>3</sub> -t | -3.32    | 0.11                                    | 1.01                          | -2.42                                    | -1.91    | -2.19     | 0.150  |
| Pt <sub>3</sub> Cu <sub>2</sub> /ZrO <sub>2</sub> | Pt <sub>3</sub> Cu <sub>2</sub> -n | -3.51    | 0.75                                    | 0.86                          | -2.70                                    | -1.67    | -2.09     | 0.074  |
|                                                   | Pt <sub>3</sub> Cu <sub>2</sub> -t | -3.50    | 0.55                                    | 0.37                          | -2.70                                    | -1.16    | -2.53     | 0.203  |
| Pt <sub>4</sub> Cu <sub>1</sub> /ZrO <sub>2</sub> | Pt <sub>4</sub> Cu <sub>1</sub> -n | -3.59    | 0.00                                    | 0.90                          | -2.80                                    | -1.68    | -1.69     | 0.137  |
|                                                   | Pt <sub>4</sub> Cu <sub>1</sub> -t | -3.73    | -0.16                                   | 0.76                          | -2.80                                    | -1.68    | -2.84     | 0.199  |
